## **Correction: Global Patterns in Human Mitochondrial DNA and Y-Chromosome Variation Caused by Spatial Instability of the Local Cultural Processes**

Vikrant Kumar, Banrida T. Langstieh, Komal V. Madhavi, Vegi M. Naidu, Hardeep Pal Singh, Silpak Biswas, Kumarasamy Thangaraj, Lalji Singh, B. Mohan Reddy

DOI: 10.1371/journal.pgen.0020053

In *PLoS Genetics*, vol 2, issue 4.

In the Supporting Information section, the sentence “The GenBank (<http://www.ncbi.nlm.nih.gov>) accession numbers for the sequence discussed in this paper are HVS1 (AY72095-AY721592)” should be “The GenBank (<http://www.ncbi.nlm.nih.gov>) accession numbers for the sequence discussed in this paper are HVS1 (AY720957-AY721592).”

This correction note may be found online at DOI: 10.1371/journal.pgen.0020095.

Published June 30, 2006

Citation: Correction: Global patterns in human mitochondrial DNA and Y-chromosome variation caused by spatial instability of the local cultural processes. *PLoS Genet* 2(6): e95.
